# Supplementary material for: Identification&nbsp;of a Phosphorus-Solubilizing Tsukamurella Tyrosinosolvens&nbsp;Strain and its Effect on the Bacterial Diversity of the Rhizosphere Soil of Peanuts Growth-Promoting
Source: Research Square preprint supplement (doi:10.21203/rs.3.rs-251104/v1), 2021-03-10
Supplement: Supplementary file 1 [file bd313e9cefb5122bdae4a232.xlsx]

## Sheet: family level
Taxonomy	A	B
Chitinophagaceae	0.123477	0.244517
Burkholderiaceae	0.061468	0.105605
Xanthomonadaceae	0.303276	0.095315
unidentified_Gammaproteobacteria	0.026537	0.056323
Microscillaceae	0.060926	0.049012
unidentified_Bacteria	0.028703	0.032765
Sphingomonadaceae	0.03818	0.028703
Rhodanobacteraceae	0.005957	0.028703
Rhizobiaceae	0.010019	0.024641
unidentified_Acidobacteria	0.010561	0.021663
Others	0.330899	0.312759
Beijerinckiaceae	0.008123	0.020309
Micromonosporaceae	0.008936	0.013268
Gemmatimonadaceae	0.010019	0.012185
Bacillaceae	0.005957	0.010561
Micrococcaceae	0.005686	0.010019
Microbacteriaceae	0.002708	0.010019
Xanthobacteraceae	0.005416	0.008394
Streptomycetaceae	0.005686	0.007582
unidentified_Rhizobiales	0.003249	0.007582
Nitrosomonadaceae	0.011914	0.007311
unidentified_Alphaproteobacteria	0.001895	0.007311
Sphingobacteriaceae	0.009477	0.00677
unidentified_Planctomycetales	0.010831	0.005957
Isosphaeraceae	0.002166	0.005957
Caulobacteraceae	0.010831	0.005686
unidentified_Planctomycetacia	0.004062	0.005686
Spirosomaceae	0.001354	0.002979
Nitrospiraceae	0.010831	0.002708
Opitutaceae	0.002437	0.002437
Haliangiaceae	0.002166	0.002437
Methylophilaceae	0.001625	0.002437
Archangiaceae	0.000542	0.002166
Flavobacteriaceae	0.008123	0.001895
Saprospiraceae	0.002708	0.001625
Cytophagaceae	0.001083	0.001625
Ktedonobacteraceae	0.000271	0.001625
Micropepsaceae	0	0.001625
Staphylococcaceae	0	0.001625
Gemmataceae	0.002979	0.001354
Acetobacteraceae	0.001625	0.001354
unidentified_Solibacterales	0.001625	0.001354
Paenibacillaceae	0.000542	0.001354
Alicyclobacillaceae	0.001625	0.001083
Longimicrobiaceae	0	0.001083
Rhodospirillaceae	0	0.001083
Pseudomonadaceae	0.002166	0.000812
Phaselicystidaceae	0.001895	0.000812
Hyphomicrobiaceae	0.000542	0.000812
Caldilineaceae	0.000271	0.000812
unidentified_Clostridiales	0	0.000812
Thermoactinomycetaceae	0.000812	0.000542
Planococcaceae	0.000271	0.000542
unidentified_Melainabacteria	0	0.000542
Tsukamurellaceae	0	0.000542
Streptosporangiaceae	0	0.000542
unidentified_Sphingobacteriales	0	0.000542
Anaerolineaceae	0.005957	0.000271
Hymenobacteraceae	0.001625	0.000271
Thermomonosporaceae	0.001354	0.000271
Crocinitomicaceae	0.000812	0.000271
Chthoniobacteraceae	0.000542	0.000271
Bdellovibrionaceae	0.000542	0.000271
Ardenticatenaceae	0.000542	0.000271
Gaiellaceae	0.000542	0.000271
Enterobacteriaceae	0.000271	0.000271
Sandaracinaceae	0.000271	0.000271
Hyphomonadaceae	0.000271	0.000271
Verrucomicrobiaceae	0	0.000271
unidentified_Chloroflexi	0	0.000271
Intrasporangiaceae	0	0.000271
Rickettsiaceae	0	0.000271
Myxococcaceae	0	0.000271
Sneathiellaceae	0	0.000271
unidentified_Flavobacteriales	0.004333	0
Chromobacteriaceae	0.002708	0
Bacteriovoracaceae	0.001083	0
Iamiaceae	0.001083	0
Geminicoccaceae	0.000812	0
Cyclobacteriaceae	0.000812	0
Polyangiaceae	0.000812	0
Rubritaleaceae	0.000812	0
Rhodobacteraceae	0.000542	0
Paracaedibacteraceae	0.000542	0
Phycisphaeraceae	0.000542	0
Oligoflexaceae	0.000542	0
unidentified_Anaerolineae	0.000542	0
Pyrinomonadaceae	0.000542	0
unidentified_Acidimicrobiia	0.000542	0
Legionellaceae	0.000271	0
Fimbriimonadaceae	0.000271	0
Nocardioidaceae	0	0
Roseiflexaceae	0	0
Tepidisphaeraceae	0	0
Solimonadaceae	0	0
Desulfarculaceae	0	0
unidentified_Cyanobacteria	0	0
Others	0.14893	0.122394
Others	0.330899	0.312759

## Sheet: family level of 6 samples
Taxonomy	A1	A2	A3	B1	B2	B3
Xanthomonadaceae	0.201462	0.243704	0.464663	0.0365556	0.196588	0.0528026
Chitinophagaceae	0.12104	0.180341	0.0690496	0.263201	0.215272	0.255077
Microscillaceae	0.0722989	0.0706742	0.039805	0.0316816	0.0601137	0.0552396
Burkholderiaceae	0.0446791	0.0649878	0.074736	0.104793	0.0682372	0.143786
Sphingomonadaceae	0.0365556	0.0511779	0.0268075	0.0170593	0.0284322	0.0406174
Nitrospiraceae	0.0300569	0.0016247	0.000812348	0.0016247	0	0.00649878
unidentified_Acidobacteria	0.0227457	0.00568643	0.00324939	0.0471162	0.00487409	0.0129976
unidentified_Bacteria	0.0219334	0.0487409	0.0154346	0.0422421	0.034931	0.021121
Nitrosomonadaceae	0.0219334	0.00974817	0.00406174	0.00568643	0.00406174	0.0121852
unidentified_Gammaproteobacteria	0.018684	0.0446791	0.016247	0.0593014	0.0885459	0.021121
Gemmatimonadaceae	0.016247	0.00893582	0.00487409	0.0146223	0.00406174	0.0178716
Anaerolineaceae	0.0138099	0.00243704	0.0016247	0.000812348	0	0
Caulobacteraceae	0.0121852	0.00487409	0.0154346	0.00406174	0.00487409	0.00812348
Rhizobiaceae	0.0105605	0.0016247	0.0178716	0.021121	0.0324939	0.0203087
unidentified_Planctomycetales	0.00974817	0.0113729	0.0113729	0.00649878	0.00406174	0.00731113
Beijerinckiaceae	0.00812348	0.00324939	0.0129976	0.0235581	0.0154346	0.0219334
Saprospiraceae	0.00731113	0.000812348	0	0.00243704	0	0.00243704
Bacillaceae	0.00649878	0.00649878	0.00487409	0.0154346	0.000812348	0.0154346
Micromonosporaceae	0.00649878	0.0146223	0.00568643	0.0121852	0.00893582	0.018684
Gemmataceae	0.00649878	0.0016247	0.000812348	0.00243704	0	0.0016247
Sphingobacteriaceae	0.00568643	0.00487409	0.0178716	0.00406174	0.00893582	0.00731113
Xanthobacteraceae	0.00568643	0.00243704	0.00812348	0.00812348	0.00893582	0.00812348
Streptomycetaceae	0.00487409	0.00406174	0.00812348	0.00731113	0.00974817	0.00568643
Phaselicystidaceae	0.00487409	0	0.000812348	0	0	0.00243704
Micrococcaceae	0.00406174	0.00406174	0.00893582	0.00731113	0.021121	0.0016247
Opitutaceae	0.00406174	0.0016247	0.0016247	0.000812348	0.00324939	0.00324939
Methylophilaceae	0.00406174	0.000812348	0	0.00406174	0.0016247	0.0016247
unidentified_Planctomycetacia	0.00324939	0.00568643	0.00324939	0.00406174	0.00893582	0.00406174
Flavobacteriaceae	0.00324939	0.0113729	0.00974817	0.00487409	0	0.000812348
unidentified_Solibacterales	0.00324939	0.0016247	0	0.0016247	0	0.00243704
Microbacteriaceae	0.00243704	0.0016247	0.00406174	0.00406174	0.00406174	0.0219334
Pseudomonadaceae	0.00243704	0.00324939	0.000812348	0.000812348	0.000812348	0.000812348
Isosphaeraceae	0.00243704	0	0.00406174	0.00487409	0.00974817	0.00324939
unidentified_Rhizobiales	0.00243704	0.00243704	0.00487409	0.00812348	0.00731113	0.00731113
Hymenobacteraceae	0.00243704	0	0.00243704	0	0	0.000812348
Spirosomaceae	0.00243704	0.000812348	0.000812348	0.00406174	0.0016247	0.00324939
Haliangiaceae	0.00243704	0.00243704	0.0016247	0.00487409	0	0.00243704
Iamiaceae	0.00243704	0	0.000812348	0	0	0
Rhodanobacteraceae	0.0016247	0.00243704	0.0138099	0.0170593	0.056052	0.0129976
Acetobacteraceae	0.0016247	0.0016247	0.0016247	0.00243704	0	0.0016247
Archangiaceae	0.0016247	0	0	0.000812348	0.00568643	0
Thermomonosporaceae	0.0016247	0	0.00243704	0	0	0.000812348
Polyangiaceae	0.0016247	0.000812348	0	0	0	0
Phycisphaeraceae	0.0016247	0	0	0	0	0
unidentified_Anaerolineae	0.0016247	0	0	0	0	0
Gaiellaceae	0.0016247	0	0	0	0	0.000812348
Pyrinomonadaceae	0.0016247	0	0	0	0	0
unidentified_Alphaproteobacteria	0.000812348	0.00406174	0.000812348	0.00893582	0.00406174	0.00893582
Chthoniobacteraceae	0.000812348	0	0.000812348	0	0	0.000812348
Paenibacillaceae	0.000812348	0.000812348	0	0	0.000812348	0.00324939
Rhodobacteraceae	0.000812348	0.000812348	0	0	0	0
Rubritaleaceae	0.000812348	0	0.0016247	0	0	0
Legionellaceae	0.000812348	0	0	0	0	0
Caldilineaceae	0.000812348	0	0	0.000812348	0	0.0016247
Sandaracinaceae	0.000812348	0	0	0	0	0.000812348
Fimbriimonadaceae	0.000812348	0	0	0	0	0
Enterobacteriaceae	0	0	0.000812348	0.000812348	0	0
unidentified_Flavobacteriales	0	0.000812348	0.0121852	0	0	0
Chromobacteriaceae	0	0.00812348	0	0	0	0
Alicyclobacillaceae	0	0.00324939	0.0016247	0.000812348	0.000812348	0.0016247
Micropepsaceae	0	0	0	0.000812348	0.00406174	0
Bdellovibrionaceae	0	0.0016247	0	0.000812348	0	0
Bacteriovoracaceae	0	0	0.00324939	0	0	0
Longimicrobiaceae	0	0	0	0	0.00243704	0.000812348
unidentified_Melainabacteria	0	0	0	0	0.0016247	0
Cytophagaceae	0	0	0.00324939	0	0.00243704	0.00243704
Verrucomicrobiaceae	0	0	0	0	0.000812348	0
Geminicoccaceae	0	0	0.00243704	0	0	0
Staphylococcaceae	0	0	0	0.00243704	0	0.00243704
Cyclobacteriaceae	0	0	0.00243704	0	0	0
Ktedonobacteraceae	0	0	0.000812348	0	0.00243704	0.00243704
Crocinitomicaceae	0	0	0.00243704	0	0.000812348	0
Planococcaceae	0	0	0.000812348	0.0016247	0	0
Hyphomicrobiaceae	0	0.000812348	0.000812348	0.000812348	0	0.0016247
Paracaedibacteraceae	0	0	0.0016247	0	0	0
Rhodospirillaceae	0	0	0	0.000812348	0.000812348	0.0016247
Thermoactinomycetaceae	0	0.0016247	0.000812348	0.0016247	0	0
Oligoflexaceae	0	0.0016247	0	0	0	0
Ardenticatenaceae	0	0.0016247	0	0	0	0.000812348
unidentified_Clostridiales	0	0	0	0.0016247	0.000812348	0
Tsukamurellaceae	0	0	0	0.0016247	0	0
Streptosporangiaceae	0	0	0	0	0.0016247	0
unidentified_Chloroflexi	0	0	0	0	0	0.000812348
Intrasporangiaceae	0	0	0	0	0	0.000812348
Rickettsiaceae	0	0	0	0.000812348	0	0
Myxococcaceae	0	0	0	0	0.000812348	0
Nocardioidaceae	0	0	0	0	0	0
Hyphomonadaceae	0	0	0.000812348	0	0	0.000812348
unidentified_Acidimicrobiia	0	0.000812348	0.000812348	0	0	0
Sneathiellaceae	0	0	0	0	0.000812348	0
unidentified_Sphingobacteriales	0	0	0	0.000812348	0.000812348	0
Others	0.226645	0.144598	0.0755483	0.17303	0.0544273	0.139724

## Sheet: SPSS date of family level
	A1	A2	A3	B1	B2	B3
Xanthomonadaceae	0.201462	0.243704	0.464663	0.0365556	0.196588	0.0528026
Chitinophagaceae	0.12104	0.180341	0.0690496	0.263201	0.215272	0.255077
Microscillaceae	0.0722989	0.0706742	0.039805	0.0316816	0.0601137	0.0552396
Burkholderiaceae	0.0446791	0.0649878	0.074736	0.104793	0.0682372	0.143786
Sphingomonadaceae	0.0365556	0.0511779	0.0268075	0.0170593	0.0284322	0.0406174
unidentified_Acidobacteria	0.0227457	0.00568643	0.00324939	0.0471162	0.00487409	0.0129976
unidentified_Bacteria	0.0219334	0.0487409	0.0154346	0.0422421	0.034931	0.021121
unidentified_Gammaproteobacteria	0.018684	0.0446791	0.016247	0.0593014	0.0885459	0.021121
Rhodanobacteraceae	0.0016247	0.00243704	0.0138099	0.0170593	0.056052	0.0129976
Rhizobiaceae	0.0105605	0.0016247	0.0178716	0.021121	0.0324939	0.0203087

## Sheet: t test
T-TEST GROUPS=treatment(1 2)
/MISSING=ANALYSIS
/VARIABLES=Xanthomonadaceae Chitinophagaceae Microscillaceae Burkholderiaceae Sphingomonadaceae unidentified_Acidobacteria unidentified_Bacteria unidentified_Gammaproteobacteria Rhodanobacteraceae Rhizobiaceae
/CRITERIA=CI(.95).
T-Test
Notes
Output Created		11-FEB-2021 00:37:32
Comments
Input	Data	C:\Users\Administrator\Desktop\P9\p9\spss\family.sav
	Active Dataset	DataSet1
	Filter	<none>
	Weight	<none>
	Split File	<none>
	N of Rows in Working Data File	6
Missing Value Handling	Definition of Missing	User defined missing values are treated as missing.
	Cases Used	Statistics for each analysis are based on the cases with no missing or out-of-range data for any variable in the analysis.
Syntax		T-TEST GROUPS=treatment(1 2) /MISSING=ANALYSIS /VARIABLES=Xanthomonadaceae Chitinophagaceae Microscillaceae Burkholderiaceae Sphingomonadaceae unidentified_Acidobacteria unidentified_Bacteria unidentified_Gammaproteobacteria Rhodanobacteraceae Rhizobiaceae /CRITERIA=CI(.95).
Resources	Processor Time	00:00:00.03
	Elapsed Time	00:00:00.01
[DataSet1] C:\Users\Administrator\Desktop\P9\p9\spss\family.sav
Group Statistics
treatment		N	Mean	Std. Deviation	Std. Error Mean
Xanthomonadaceae	CK	3	0.303276	0.141352	0.0816095
	P9	3	0.0953157	0.0880798	0.0508529
Chitinophagaceae	CK	3	0.123477	0.0556855	0.03215
	P9	3	0.244517	0.0256503	0.0148092
Microscillaceae	CK	3	0.060926	0.0183094	0.0105709
	P9	3	0.049012	0.0152048	0.00877849
Burkholderiaceae	CK	3	0.0614677	0.0153346	0.00885344
	P9	3	0.105605	0.0377811	0.0218129
Sphingomonadaceae	CK	3	0.0381803	0.0122664	0.00708203
	P9	3	0.0287027	0.0117813	0.00680196
unidentified_Acidobacteria	CK	3	0.0105603	0.0106232	0.00613331
	P9	3	0.0216627	0.0224144	0.0129409
unidentified_Bacteria	CK	3	0.028703	0.0176549	0.0101931
	P9	3	0.0327647	0.0107259	0.00619257
unidentified_Gammaproteobacteria	CK	3	0.0265367	0.0157589	0.00909841
	P9	3	0.0563227	0.033811	0.0195208
Rhodanobacteraceae	CK	3	0.00595733	0.00681272	0.00393332
	P9	3	0.028703	0.0237718	0.0137247
Rhizobiaceae	CK	3	0.0100193	0.00813703	0.00469792
	P9	3	0.0246413	0.00681272	0.00393332
Independent Samples Test
		Levene's Test for Equality of Variances		t-test for Equality of Means
		F	Sig.	t	df	Sig. (2-tailed)	Mean Difference	Std. Error Difference	95% Confidence Interval of the Difference
									Lower	Upper
Xanthomonadaceae	Equal variances assumed	1.36217	0.307993	2.16272	4	0.0965938	0.207961	0.0961568	-0.0590134	0.474935
	Equal variances not assumed			2.16272	3.34966	0.109842	0.207961	0.0961568	-0.0807523	0.496674
Chitinophagaceae	Equal variances assumed	0.98464	0.377224	-3.4195	4	0.0267924	-0.12104	0.0353969	-0.219317	-0.0227622
	Equal variances not assumed			-3.4195	2.81215	0.0461729	-0.12104	0.0353969	-0.238067	-0.00401207
Microscillaceae	Equal variances assumed	0.278516	0.625594	0.867061	4	0.434826	0.011914	0.0137407	-0.0262362	0.0500642
	Equal variances not assumed			0.867061	3.86943	0.436364	0.011914	0.0137407	-0.0267493	0.0505773
Burkholderiaceae	Equal variances assumed	1.21349	0.332469	-1.87491	4	0.134067	-0.0441377	0.0235412	-0.109498	0.0212231
	Equal variances not assumed			-1.87491	2.64155	0.169838	-0.0441377	0.0235412	-0.125149	0.0368737
Sphingomonadaceae	Equal variances assumed	0.019082	0.896806	0.965193	4	0.389106	0.00947767	0.00981945	-0.0177855	0.0367408
	Equal variances not assumed			0.965193	3.99351	0.389189	0.00947767	0.00981945	-0.017803	0.0367583
unidentified_Acidobacteria	Equal variances assumed	2.78261	0.170618	-0.775259	4	0.481467	-0.0111023	0.0143208	-0.0508633	0.0286586
	Equal variances not assumed			-0.775259	2.85534	0.497291	-0.0111023	0.0143208	-0.058012	0.0358073
unidentified_Bacteria	Equal variances assumed	1.36805	0.307087	-0.340551	4	0.750575	-0.00406167	0.0119267	-0.0371756	0.0290523
	Equal variances not assumed			-0.340551	3.29935	0.753989	-0.00406167	0.0119267	-0.0401421	0.0320188
unidentified_Gammaproteobacteria	Equal variances assumed	1.12149	0.349311	-1.38301	4	0.238849	-0.029786	0.021537	-0.0895823	0.0300103
	Equal variances not assumed			-1.38301	2.82979	0.265688	-0.029786	0.021537	-0.100719	0.0411467
Rhodanobacteraceae	Equal variances assumed	7.06284	0.0565316	-1.59315	4	0.186347	-0.0227457	0.0142772	-0.0623854	0.0168941
	Equal variances not assumed			-1.59315	2.32633	0.234675	-0.0227457	0.0142772	-0.0766135	0.0311222
Rhizobiaceae	Equal variances assumed	0.0159426	0.905615	-2.38644	4	0.0754588	-0.014622	0.00612711	-0.0316336	0.00238958
	Equal variances not assumed			-2.38644	3.8801	0.0774523	-0.014622	0.00612711	-0.0318429	0.00259893
